# Supplementary material
Source: publisher figshare collection journal article supplement (https://acs.figshare.com/ndownloader/files/4520770)
Supplement: Supplementary file 1 [file 4520770]

**Title of the manuscript: Cloud Point and Microemulsion Phase Behavior of Sodium linearalkylbenzene sulphonate (NaLAS) with tetrabutyl- and benzyltributyl-substituted ammonium salts.**

**Deeleep K Rout<sup>a</sup>, Siddharth Chauhan<sup>b</sup>, and Ashwani Agarwal<sup>b</sup>**

*<sup>a</sup>Unilever Research India and Hindustan Unilever Research Centre, 64 Main Road, Whitefield, Bangalore 560066, India*

*<sup>b</sup>Indian Institute of Technology, Kanpur, India*

**Supporting Documents:**

The Chemical composition of the raw material (Linear alkyl benzene sulphonic acid), from which sodium salt of linear alkyl benzene sulphonate is prepared, is estimated by a standard analytical technique (UOP 673).

| Components of LAS-acid    | Wt. % | Chain length of Active LAS acid | Chain length Distribution (wt.%) |
|---------------------------|-------|---------------------------------|----------------------------------|
|                           | 95.5  | C9                              | 1                                |
|                           |       | C10                             | 10                               |
|                           |       | C11                             | 35                               |
|                           |       | C12                             | 33                               |
|                           |       | C13                             | 20                               |
|                           |       | ≥C14                            | 1                                |
| Isoalkylate               | 4     |                                 |                                  |
| Non-active organic matter | 0.5   |                                 |                                  |
| Water                     | 0.02  |                                 |                                  |

Table 1: Chemical composition of LAS acid as well as chain length distribution of Active LAS acid.

LAS acid was reacted with sodium hydroxide (AR grade, Aldrich) in a stoichiometric amount in aqueous medium to prepare Na-LAS. The titration curve of the reaction is given below.

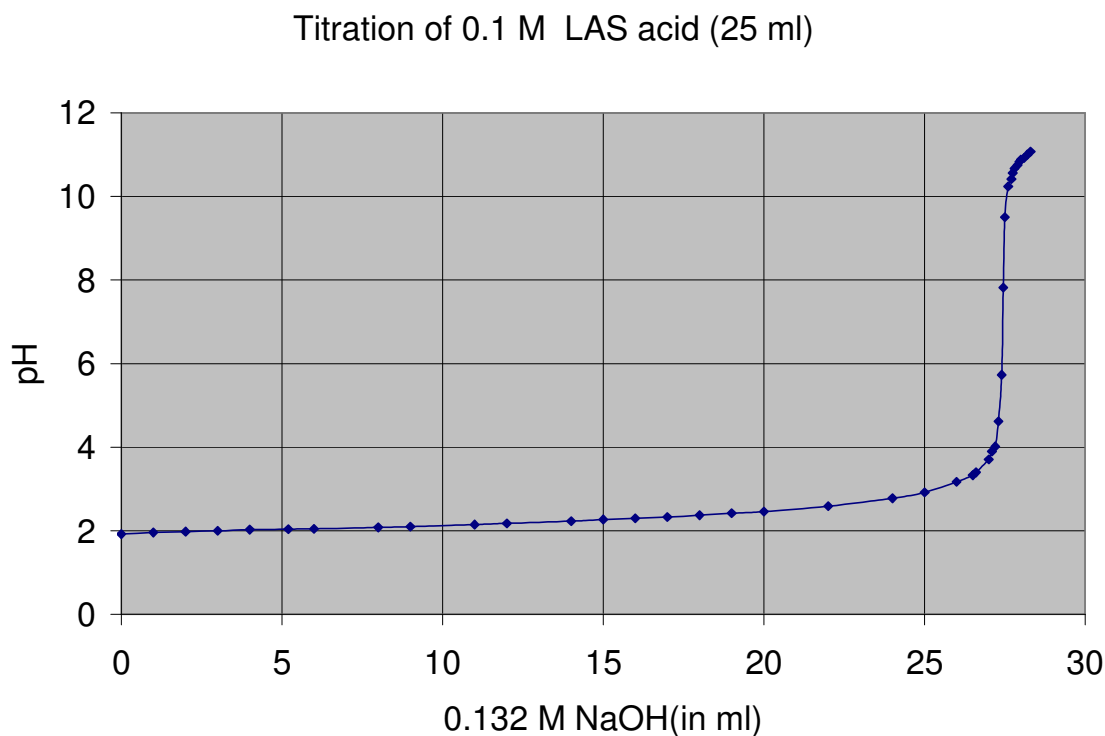

As may be seen from the above figure, complete neutralization of LAS-acid with NaOH occurs when  $\frac{d(\text{pH})}{d(v)}$  is maximum, where pH is of solution and V is the volume of aq. NaOH. The point of maximum derivative occurs at pH of 7.82. The Na-LAS solution thus used in the study had a pH of 8.0.
